# Supplementary material for: Why is transition between child and adult services a dangerous time for young people with chronic kidney disease? A mixed-method systematic review
Source: PubMed Central journal article supplement (PMC6071995; doi:10.1371/journal.pone.0201098), 2018-08-02
Supplement: pone.0201098.s001.pdf [file pone.0201098.s001.pdf]

S1 Table: Summary of included studies

| Author and Reference                              | Context                   | Study Design            | Country                                       | Synthesis stream | Focus / Research question                                                                                                                                                                 | Sample                                                                                                                |
|---------------------------------------------------|---------------------------|-------------------------|-----------------------------------------------|------------------|-------------------------------------------------------------------------------------------------------------------------------------------------------------------------------------------|-----------------------------------------------------------------------------------------------------------------------|
| Aasebø et al. (2009) [37]                         | Patient outcomes          | Cross-sectional survey  | Norway                                        | S1               | Quality of life of young transplant recipients                                                                                                                                            | 131 Young adult (18–35 years of age) transplant recipients                                                            |
| Akchurin et al. (2014) [65]                       | Clinical study            | Cohort Study            | US                                            | S1               | Whether adherence to immunosuppressant medications changes during transition from a pediatric to an adult program within the same transplant center                                       | 24 patients studied in one transplant centre                                                                          |
| Andreoni et al. (2013) [25]                       | Clinical study            | Cohort Study            | US                                            | S1               | US study of graft loss                                                                                                                                                                    |                                                                                                                       |
| Bell H, Hope W (2012) [66]                        | Clinical intervention     | Mixed methods           | UK                                            | S2               | Improve clinical outcomes for young adults (aged 18-25) with CKD                                                                                                                          | Unclear                                                                                                               |
| Chaturvedi, Jones, Walker & Sawyer (2009) [46]    | Research Protocol         | Cohort Study            | UK                                            | S3               | Surveying of people experiencing young adult kidney failure                                                                                                                               | UK young adults aged 16-30 on chronic RRT in 2015 (n≈1000)                                                            |
| De Ferris and Diaz-Gonzalez de Ferris (2011) [1]. | Clinical practice         | Secondary data analysis | EU, North America, Australia, and New Zealand | S1               | Unique Morbidities and Adherence Issues of adolescents and YP with CKD                                                                                                                    | 15- to 24-year-old patients, 7,000 adolescent/emerging-adult dialysis patients and 11,000 renal transplant recipients |
| Ritchie, Clayton, Mackie et al. (2012) [67]       | Patient outcomes          | Cross-sectional survey  | Australia                                     | S3               | Satisfaction survey combined with clinical records of success                                                                                                                             | 11 patients                                                                                                           |
| Department for Health (2006) [68]                 | Policy statement          | n/a                     | UK                                            | S2               | National Service Framework for renal services: working for children and YP                                                                                                                | n/a                                                                                                                   |
| East Midlands Renal Network (2012) [41]           | Intervention review       | Mixed methods           | UK                                            | S1, S2           | young adults aged 18 – 25 years with chronic kidney disease                                                                                                                               | 80 young adults in baseline, 76 after 12 months                                                                       |
| Ferris et al (2015) [28]                          | Intervention proposals    | n/a                     | US                                            | S1, S2           | Adolescents/young adults (AYA) with chronic kidney disease (CKD) or end-stage kidney disease (ESKD)                                                                                       | n/a                                                                                                                   |
| Forbes et al. (2014) [29]                         | Clinical intervention     | Cross sectional survey  | Europe                                        | S1               | Transition and transfer of young adult patients from paediatric to adult renal units                                                                                                      | 15 centres                                                                                                            |
| Foster et al. (2011) [57]                         | Clinical study            | Cohort Study            | Canada                                        | S1               | Research looking at impact of age at transfer on renal allograft failure rates                                                                                                            | 440 kidney recipients who had been transferred from pediatric to adult care                                           |
| Gilleland Marchak et al. (2015) [39]              | Clinical intervention     | Mixed methods           | US                                            | S2               | Evaluation of Readiness for Transition Questionnaire (RTQ) for transition readiness perceptions, adolescent healthcare behavior, and familial involvement in health care for CKD patients | 49 kidney transplant patients                                                                                         |
| Guy's and St Thomas' NHS Foundation Trust (2012)  | Patient's self-management | n/a                     | UK                                            | S2               | Support of self-management and kidney care record                                                                                                                                         | n/a                                                                                                                   |
| Hamilton et al. (2015) [69]                       | Patient satisfaction      | Focus group             | UK                                            | S3               | Aspects of the transition highlighted by YP. Compliance as measure.                                                                                                                       | Ten participants aged 18 to 23 years with CKD and three parents.                                                      |

|                                                 |                            |                                                  |         |    |                                                                                                                             |                                                                                                                                                                              |
|-------------------------------------------------|----------------------------|--------------------------------------------------|---------|----|-----------------------------------------------------------------------------------------------------------------------------|------------------------------------------------------------------------------------------------------------------------------------------------------------------------------|
| <b>Hannigan &amp; Turner (2011)</b> [49]        | Opinion study              | Ethnography / Case Studies                       | UK      | S3 | The views of parents of young adults with CKD                                                                               | Four interviews with parents                                                                                                                                                 |
| <b>Harden et al (2012)</b> [6]                  | Quality improvement report | n/a                                              | UK      | S2 | Report on effectiveness of young adult clinics                                                                              | 9 patients (direct transfer) and 12 patients (young adult services)                                                                                                          |
| <b>Harden and Nadine (2006)</b> [55]            | Case study                 | Case study                                       | USA     | S3 | Draws on the personal experiences of patients who have made the transition from paediatric care to adult care               | 1 case study                                                                                                                                                                 |
| <b>Harden et al. (2012)</b> [6]                 | Intervention evaluation    | Cohort study                                     | UK      | S2 | Before and after study of the impact of a new integrated paediatric-adult clinical service for patients with kidney failure | 12 paediatric transplant recipients (seven male, five female) aged 17.5 (16–18) years                                                                                        |
| <b>Harden et al. (2010)</b> [70]                | Intervention evaluation    | Cohort Study                                     | UK      | S2 | Conference report on the Oxford Young Adult Transplant Clinic                                                               | 19 patients attending the Young Adult Transplant Clinic                                                                                                                      |
| <b>Iitaka et al. (2008)</b> [30]                | Clinical Study             | Retrospective Cohort Study                       | Japan   | S1 | Transition of patients with membranoproliferative glomerulonephritis (MPGN)                                                 | 27 children all aged 18 at end of study                                                                                                                                      |
| <b>Ipsos Mori / NHS Kidney Care (2012)</b> [48] | Clinical study             | Qualitative study                                | UK      | S3 | To examine ways in which families cope with oral medication post-transplant                                                 | 17 transplant patients and their caregivers                                                                                                                                  |
| <b>Ipsos MORI (2013)</b> [52]                   | Opinion study              | Ethnography / Case Studies                       | UK      | S3 | The views of YP with CKD                                                                                                    | Six YP aged 20 to 26                                                                                                                                                         |
| <b>Javalkar et al. (2014)</b> [38]              | Patient study              | Cohort study                                     | US      | S1 | Testing of TRxANSITION scale for readiness for self-management and transition.                                              | 52 adolescents and young adults aged 13 to 21                                                                                                                                |
| <b>Jorge et al. (2007)</b> [71]                 | Clinical study             | Retrospective cohort study                       | US      | S2 | Evaluation of paediatric to adult out-patient clinic                                                                        | 69 patients. Mean age 17.6 years                                                                                                                                             |
| <b>Kiberd, Acott and Kiberd (2011)</b> [26]     | Clinical study             | Single center program retrospective chart review | Canada  | S1 | Evaluation of transfer process from paediatric to adult care.                                                               | Young adults 18 to 25 attending a single centre.                                                                                                                             |
| <b>Kreuzer et al. (2014)</b> [72]               | Clinical Trial             | Evaluation of Transition programme               | Germany | S2 | Evaluation of the current patient transition situation in all existing German pediatric and nephrology departments          | 17 centres                                                                                                                                                                   |
| <b>Cameron et al. (2011)</b> [73]               | Review                     | Review of transition issues                      | US      | S1 | Barriers to transitioning that                                                                                              | n/a                                                                                                                                                                          |
| <b>Lewis and Arber (2015a)</b> [33]             | Patient experience         | Qualitative study                                | UK      | S1 | Gender, peer and intimate relationships amongst YP with CKD                                                                 | Qualitative interview data from 40 young adults aged 16–30 years with end-stage kidney disease                                                                               |
| <b>Lewis and Arber, (2015b)</b> [32]            | Patient experience         | Qualitative study                                | UK      | S1 | Link between age, renal failure and education and employment                                                                | 35 qualitative interviews with end-stage renal failure patients, aged 20–30 years, first diagnosed at 0–19 years of age                                                      |
| <b>Lewis and Marks, (2014)</b> [34]             | Patient outcomes           | Cross sectional survey                           | UK      | S1 | Age of CKD presentation and effects of education and employment                                                             | Young adults (n = 296, 52 % male, 79 % Caucasian and 73% with functioning renal allograft) with a mean age at first presentation of ESKD and current age of 17 and 25 years, |

|                                                                 |                                    |                                 |             |        |                                                                                                                         |                                                                                                          |
|-----------------------------------------------------------------|------------------------------------|---------------------------------|-------------|--------|-------------------------------------------------------------------------------------------------------------------------|----------------------------------------------------------------------------------------------------------|
| Lewis (2012) [47]                                               | Thesis study                       | Mixed methods                   | UK          | S1, S3 | Experiences of biographical disruption at critical moments in the lives of young adults with childhood renal failure.   | 40 patient interviews and 10 parent/guardian interviews                                                  |
| McDonagh and Kelly (2010) [74]                                  | Research and policy gaps           | Review of transition issues     | US          | S1     | Challenges and opportunities for transitional care research                                                             | n/a                                                                                                      |
| McNulty (2014) [75]                                             | Intervention description           | Conference presentation         | UK          | S2     | Description of the Salford Adult / Transition Renal Clinic.                                                             | n/a                                                                                                      |
| McQuillan et al. (2015) [27]                                    | Retrospective study                | Cohort study                    | Canada      | S1, S2 | Whether a transfer clinic for YP with kidney transplants improves adherence post transfer                               | 16 kidney transplant recipients who transferred before the clinic was established and 16 from afterwards |
| Mekahli et al. (2014) [35]                                      | Patient quality of life            | Cohort Study                    | Holland     | S1, S3 | Quality of life of YP diagnosed with CKD in infancy                                                                     | 41 patients <16 years                                                                                    |
| Murray et al., (2014) [31]                                      | Patient outcomes                   | Mixed methods                   | UK          | S1     | Impact of CKD on academic and employment outcomes.                                                                      | 57 young adults (ave. age 25)                                                                            |
| Myers (2002) [76]                                               | Intervention evaluation            | Mixed methods                   | Australia   | S3     | Patient perspectives of a young adult renal clinic                                                                      | 15 patients                                                                                              |
| Nagra et al. (2015) [40]                                        | Report on new transition programme | n/a                             | UK          | S2     | Discusses the benefits of a new programme to help those transitioning from pediatric to adult care.                     | n/a                                                                                                      |
| National Institute for Clinical Excellence (NICE) (2015) [77]   | Draft for consultation             | n/a                             | UK          | S2     | A draft guideline for recommendations for transitions.                                                                  | n/a                                                                                                      |
| Foster and Pai (2014) [78]                                      | Case study                         | Case study                      | UK          | S3     | Draws on the personal experiences of patients who have made the transition from pediatric care to adult care            | 2 case studies                                                                                           |
| Lämmermühle, Oldhafer, Blume, Weiss, and Ahlenstiel (2013) [79] | Retrospective study                | Case control study              | Germany     | S1, S2 | The use of a specialised transition clinic improved the level of patient satisfaction and aided the transition process. | 66 patients. Data collected one year before and after transfer                                           |
| Remorino and Taylor (2006) [80]                                 | patient satisfaction               | Qualitative study               | UK          | S2     | Investigation of transitional clinics                                                                                   | 18 patients                                                                                              |
| Samuel and Nettel-Aguirre (2012) [81]                           | clinical study                     | cohort study                    | USA         | S1, S2 | Adaption period to adult care associated with twofold risk in graft failure                                             | 413 patients with childhood-onset ESRD                                                                   |
| Samuel et al. (2014) [82]                                       | patient outcomes                   | cohort study                    | Canada      | S1     | Hospitalisation after transfer to adult care                                                                            | 349 patients divided in a cohort with transfer to adult care and 1 cohort solely cared for in adult care |
| Sattoe et al. (2014). [60]                                      | Clinical intervention              | Qualitative study               | Netherlands | S2     | Feasibility of intervention                                                                                             | participants of 'skills for growing up' tool                                                             |
| Sattoe, Jedeloo, and van Staa (2013). [63]                      | Peer-to-peer-support               | Qualitative/mixed methods study | Netherlands | S2     | Experience as buddy/attendee in the intervention                                                                        | 62 participants of 'Camp COOL'-programme                                                                 |
| Shaw et al.(2003). [83]                                         | Clinical study                     | Cohort Study                    | USA         | S1     | Risk of non-adherence, rejection, and graft loss for adolescents                                                        | 112 transplant patient's at children's hospital                                                          |
| Tong et al. (2015) [51]                                         | Patient outcomes                   | Mixed methods study             | USA         | S3     | YP's experiences and perspectives regarding kidney disease, special focus on body image                                 | 10 patients from a large urban teaching hospital, purposive samples                                      |
| Van den Heuvel et al. (2010) [22]                               | Clinical study                     | Cohort Study                    | Netherlands | S1     | Correlation of age at transplantation and transition                                                                    | cohort of 162 immigrant and Dutch patients                                                               |

|                                                  |                      |                        |                           |    |                                                                                      |                                                                                                                                                                                               |
|--------------------------------------------------|----------------------|------------------------|---------------------------|----|--------------------------------------------------------------------------------------|-----------------------------------------------------------------------------------------------------------------------------------------------------------------------------------------------|
| <b>Tong et al. (2011)</b> [84]                   | Patient outcomes     | Mixed methods          | Australia                 | S3 | Experiences and perspectives of adolescent kidney transplant recipient               | 22 in-depth, face-to-face interviews with adolescent kidney transplant recipients (aged 12-19 yr) from five Australian pediatric transplant units                                             |
| <b>Watson (2000)</b> [8]                         | Clinical study       | Cohort Study           | UK                        | S1 | Transplant failure in young adults following transition.                             | 20 young adults (9 female) who had been transferred to three different adult centres at a mean age of 17.9 years (range 15.7–20.9 years) having been transplanted at a mean age of 14.3 years |
| <b>Watson, Alan R (2011)</b> [85]                | Patient information  | n/a                    | UK                        | S1 | Transition and transfer of young adult patients from paediatric to adult renal units | n/a                                                                                                                                                                                           |
| <b>Watson et al.(2011)</b> [86]                  | Consensus statement  | n/a                    | UK, USA, Australia, Egypt | S1 | Recommended action for transition process                                            | n/a                                                                                                                                                                                           |
| <b>Wells, Ritchie, and McPherson (2013)</b> [58] | Patient Survey       | Cross-sectional survey | UK - South West           | S3 | Views of YP and adolescents with CKD on transition.                                  | Not clear. Two age groups - 14 to 18 and 18 to 25                                                                                                                                             |
| <b>NHS England (2007)</b> [87]                   | Training materials   | n/a                    | UK                        | S2 | Renal Action Learning Sets                                                           | Records of Action Learning sets involving transition from teams at Birmingham and London.                                                                                                     |
| <b>Woodland, Jo (2013)</b> [50]                  | Service Improvement  | Qualitative study      | UK                        | S3 | Improvement of support for young adults                                              | 30 14-18 year olds (response rate 53%), 105 18-25 year olds (response rate 52%)                                                                                                               |
| <b>Zheng, Kai et al (2010)</b> [88]              | Patient satisfaction | Qualitative study      | USA                       | S2 | Feasibility of web community for ESRD patients                                       | 46 ESRD patients from 18 dialysis units                                                                                                                                                       |
